# Supplementary material for: Evaluation of the quality of transesophageal echocardiography images and verification of proficiency
Source: PubMed Central journal article supplement — Echo Res Pract. 2018 Apr 26;5(3):89–95. doi: 10.1530/ERP-18-0002 (PMC6013720; doi:10.1530/erp-18-0002), 2018-04-26
Supplement: erp-5-89-t001.pdf [file erp-5-89-t001.pdf]

**Supplementary Table 1** Actual Ultrasound Course-Summarized

Three components

1. Live/hands-on, once or twice a week
2. Online Modules, several topics on TEE/TTE/Abdominal (20 min)
3. E-books:
  - a. Regional Anesthesia
  - b. Physics
  - c. TTE
  - d. TEE
