# Supplementary material for: Evaluation of the quality of transesophageal echocardiography images and verification of proficiency
Source: PubMed Central journal article supplement — Echo Res Pract. 2018 Apr 26;5(3):89–95. doi: 10.1530/ERP-18-0002 (PMC6013720; doi:10.1530/erp-18-0002), 2018-04-26
Supplement: erp-5-89-t002.pdf [file erp-5-89-t002.pdf]

## **Supplementary Table 2** Fundamentals of Ultrasound FUS

Main Topics:

1. Basic Physics
2. Physics and Regional
3. Regional
4. Cardiac Anatomy
5. TEE: Left ventricle
6. TEE: Right ventricle and Aorta
7. TEE: Mitral valve
8. TEE: 3D introduction
9. RUSH /FAST
10. Cases
11. Final: examination
