# Supplementary material for: Evaluation of the quality of transesophageal echocardiography images and verification of proficiency
Source: PubMed Central journal article supplement — Echo Res Pract. 2018 Apr 26;5(3):89–95. doi: 10.1530/ERP-18-0002 (PMC6013720; doi:10.1530/erp-18-0002), 2018-04-26
Supplement: erp-5-89-t003.pdf [file erp-5-89-t003.pdf]

**Supplementary Table 3** Transesophageal Echocardiogram Standard Images

1. Mid-esophageal (ME)
2. ME two chamber,
3. ME long axis view,
4. ME ascending aorta long axis,
5. ME ascending aorta short axis,
6. ME aortic valve short axis,
7. ME right ventricular inflow-outflow,
8. ME bicaval,
9. Transgastric mid short axis,
10. Descending aorta short axis,
11. Descending aorta long axis,
12. Deep transgastric long axis, and
13. Transgastric long axis.
