# Supplementary figures and images for: Evaluation of the quality of transesophageal echocardiography images and verification of proficiency
Source: PubMed Central journal article supplement — Echo Res Pract. 2018 Apr 26;5(3):89–95. doi: 10.1530/ERP-18-0002 (PMC6013720; doi:10.1530/erp-18-0002), 2018-04-26

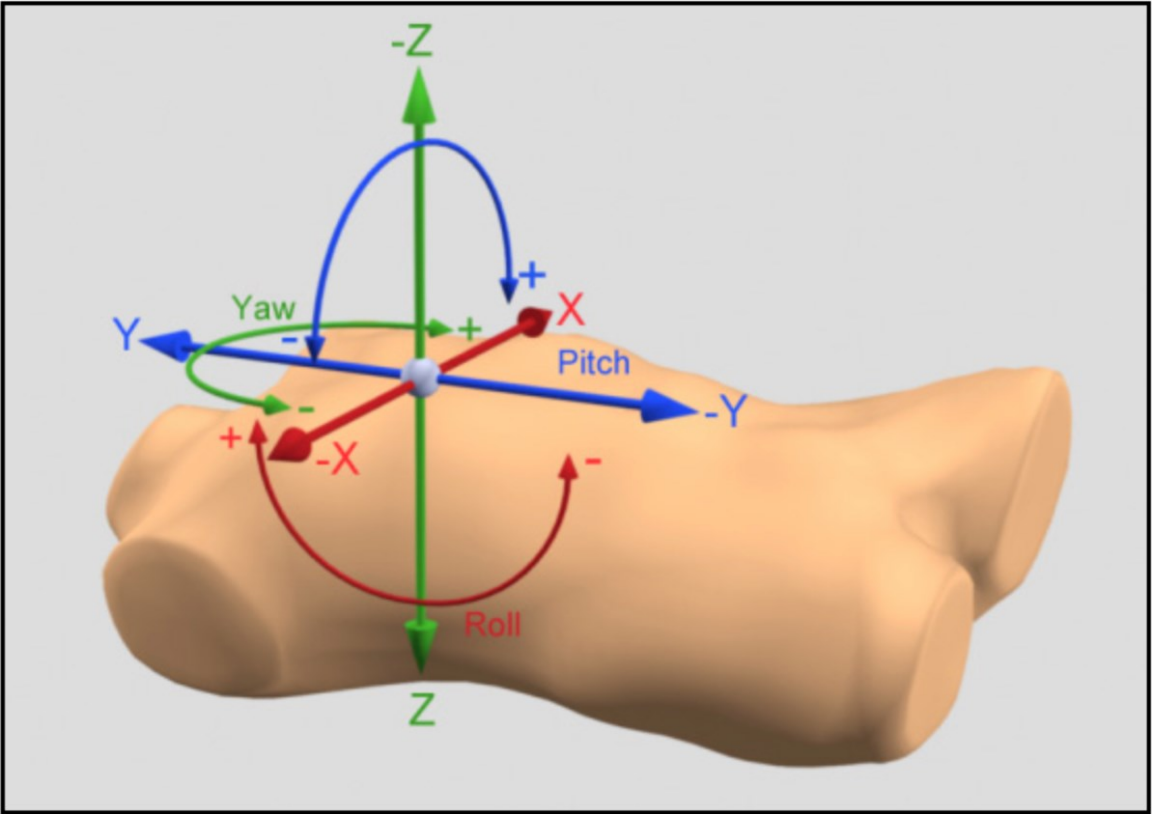

Supplement: erp-5-89-s001.pdf [file erp-5-89-s001.pdf]
